# Supplementary material for: Integrated DNA methylation and gene expression analysis in the pathogenesis of coronary artery disease
Source: Aging (Albany NY). 2019 Mar 7;11(5):1486–500. doi: 10.18632/aging.101847 (PMC6428103; doi:10.18632/aging.101847)
Supplement: Supplementary Table 1 [file aging-11-101847-s001.xlsx]

## Sheet: The details of DMaGs
SYMBOL	ENTREZID
A4GNT	51146
ABCC1	4363
ABCG1	9619
ABLIM1	3983
ACACA	31
ACAD8	27034
ACOT7	11332
ACP5	54
ACSL5	51703
ACSL6	23305
ADAM12	8038
ADAMTS13	11093
ADAMTS18	170692
ADAMTS2	9509
ADCY6	112
ADCY8	114
ADM2	79924
ADRA2C	152
ADSL	158
AKAP12	9590
AKR1C2	1646
ALDH1L1	10840
AMDHD2	51005
ANK1	286
ANK2	287
ANK3	288
ANKRD17	26057
ANKRD2	26287
ANKS1B	56899
ANLN	54443
ANTXR1	84168
AP2A1	160
APBB2	323
APH1B	83464
APOBEC2	10930
ARHGAP18	93663
ARHGEF10	9639
ARHGEF10L	55160
ARHGEF3	50650
ARMC2	84071
ARSB	411
ASB2	51676
ASB4	51666
ASPHD1	253982
ASXL2	55252
ATF1	466
ATG4D	84971
ATM	472
ATP10B	23120
ATP2A1	487
ATP2C1	27032
ATP8B1	5205
ATP8B3	148229
ATXN7	6314
ATXN7L1	222255
AURKB	9212
AURKC	6795
B4GALNT3	283358
B4GALT2	8704
BAIAP2	10458
BAZ1B	9031
BCL11A	53335
BCL2L14	79370
BDH1	622
BDNF	627
BLK	640
BMP4	652
BMP6	654
BMPR1A	657
BMPR1B	658
BNC1	646
BTBD3	22903
BTNL3	10917
BTRC	8945
C15orf48	84419
C1QA	712
C1S	716
C1orf127	148345
C1orf21	81563
C1orf52	148423
C3orf14	57415
CA10	56934
CAB39L	81617
CABLES1	91768
CABP2	51475
CACNA1C	775
CACNB2	783
CALCB	797
CAMK2A	815
CAMTA1	23261
CAPN12	147968
CARD14	79092
CASQ2	845
CASR	846
CAST	831
CAV2	858
CBLN4	140689
CCDC77	84318
CCL1	6346
CCL26	10344
CCL8	6355
CD274	29126
CD300C	10871
CDH13	1012
CDH23	64072
CDH24	64403
CDH26	60437
CDH5	1003
CDH8	1006
CDK5RAP1	51654
CDKN1C	1028
CDO1	1036
CDSN	1041
CEACAM8	1088
CECR2	27443
CELSR3	1951
CHID1	66005
CHML	1122
CHN2	1124
CHRFAM7A	89832
CHRNB4	1143
CKMT1B	1159
CLDN6	9074
CMIP	80790
CNFN	84518
CNNM2	54805
CNR1	1268
CNTNAP2	26047
COL12A1	1303
COL13A1	1305
COL20A1	57642
COL9A1	1297
COMMD10	51397
CORT	1325
CPB2	1361
CPEB1	64506
CPLX1	10815
CPOX	1371
CREM	1390
CRISP2	7180
CRYM	1428
CTNNAL1	8727
CUL3	8452
CXCL12	6387
CYFIP1	23191
CYP39A1	51302
CYP7B1	9420
CYYR1	116159
DCHS2	54798
DCN	1634
DCP1A	55802
DCPS	28960
DDX20	11218
DEFB114	245928
DEFB118	117285
DGKA	1606
DGKE	8526
DHRS9	10170
DHX9	1660
DICER1	23405
DIP2A	23181
DIP2C	22982
DKK3	27122
DLX2	1746
DNAH10	196385
DNASE1L3	1776
DNMT3B	1789
DOCK4	9732
DST	667
DUSP4	1846
DUSP5	1847
EAF1	85403
EBF3	253738
EGFR	1956
EHF	26298
ELAVL3	1995
ELF5	2001
ELL2	22936
ENPEP	2028
ENPP2	5168
ENTPD4	9583
EPAS1	2034
EPB41L4B	54566
EPB41L5	57669
EPHA6	285220
ERBB4	2066
ERCC8	1161
ERG	2078
ESR1	2099
ESRRG	2104
ETS2	2114
ETV5	2119
EVL	51466
EYA3	2140
F12	2161
F2RL2	2151
FAM111B	374393
FAM3C	10447
FANCA	2175
FAT3	120114
FAT4	79633
FBLN2	2199
FBXL13	222235
FBXL14	144699
FBXO27	126433
FGD4	121512
FGF11	2256
FGF12	2257
FGFR2	2263
FHOD1	29109
FIBCD1	84929
FMN2	56776
FMNL2	114793
FOLR3	2352
FRAS1	80144
FREM2	341640
FRG1	2483
FRMPD1	22844
FSIP1	161835
FSTL1	11167
FUT10	84750
FXN	2395
FYN	2534
FZD6	8323
GABBR1	2550
GABRB1	2560
GABRD	2563
GABRR3	200959
GAPDH	2597
GDF10	2662
GDNF	2668
GFRA3	2676
GHRL	51738
GJA5	2702
GLRA1	2741
GLRX2	51022
GLT1D1	144423
GLYATL2	219970
GNAS	2778
GNGT1	2792
GNPTG	84572
GP5	2814
GPC6	10082
GPR142	350383
GPR26	2849
GPR88	54112
GPS2	2874
GRIK1	2897
GSTM5	2949
GTF2IRD1	9569
HAS1	3036
HBA1	3039
HBA2	3040
HECW1	23072
HECW2	57520
HEPHL1	341208
HESX1	8820
HHAT	55733
HK1	3098
HLA-E	3133
HLA-G	3135
HMGCS1	3157
HOXC4	3221
HS1BP3	64342
HSP90AB1	3326
HSPA2	3306
HTR2A	3356
HTRA4	203100
IDE	3416
IDH2	3418
IGFBP1	3484
IGFBP5	3488
IGSF9	57549
IL12B	3593
IL16	3603
IL18BP	10068
IL1R1	3554
IL20	50604
IL6	3569
IL7	3574
INA	9118
INPP5F	22876
IQCE	23288
IQSEC3	440073
IRF7	3665
IRX5	10265
ITCH	83737
ITGB1	3688
ITGBL1	9358
ITPR2	3709
IVL	3713
JPH2	57158
KALRN	8997
KCNH2	3757
KCNH7	90134
KCNIP4	80333
KCNK10	54207
KCNK9	51305
KCNMA1	3778
KCNQ2	3785
KIAA1549	57670
KIF1B	23095
KIF25	3834
KLC2	64837
KLF5	688
KLHL20	27252
KLHL6	89857
KLHL8	57563
KNDC1	85442
KRIT1	889
KRT17	3872
KRT23	25984
KY	339855
L3MBTL4	91133
LAMA3	3909
LAMA4	3910
LAMB1	3912
LAMB3	3914
LCT	3938
LDB2	9079
LDLRAD3	143458
LEPR	3953
LGI1	9211
LGMN	5641
LHX1	3975
LIFR	3977
LIPC	3990
LMO7	4008
LMX1A	4009
LNX1	84708
LRIG3	121227
LRP1	4035
LRP1B	53353
LRP4	4038
LRP5L	91355
LRRFIP1	9208
LRRFIP2	9209
LSR	51599
LTB4R	1241
LTBP3	4054
LY9	4063
LYZ	4069
LZTFL1	54585
MACF1	23499
MAD1L1	8379
MAFF	23764
MAGI2	9863
MAP3K14	9020
MAP3K3	4215
MAP4	4134
MAP6D1	79929
MAPK4	5596
MAPT	4137
MASP2	10747
MATN2	4147
MBD6	114785
MCC	4163
MCHR2	84539
MDH2	4191
ME3	10873
MED12L	116931
MEGF11	84465
MESP2	145873
MGP	4256
MINPP1	9562
MITF	4286
MKKS	8195
MLF1	4291
MMP28	79148
MMRN1	22915
MMRN2	79812
MOV10L1	54456
MTMR10	54893
MUC2	4583
MYB	4602
MYL4	4635
MYO5A	4644
MYO5B	4645
MYO6	4646
MYT1	4661
MYT1L	23040
NAGS	162417
NAV2	89797
NAV3	89795
NBEAL2	23218
NCAM2	4685
NEK3	4752
NETO1	81832
NFASC	23114
NFYC	4802
NHSL1	57224
NIPA1	123606
NKG7	4818
NMNAT2	23057
NMU	10874
NPAS4	266743
NR1I2	8856
NR2E3	10002
NR4A2	4929
NR4A3	8013
NRCAM	4897
NRP1	8829
NRXN1	9378
NTSR1	4923
NUAK1	9891
OPA1	4976
OPCML	4978
OR1A1	8383
OR2B2	81697
OR2B6	26212
OR4K1	79544
OR9Q1	219956
OSMR	9180
OTOA	146183
OTOF	9381
OVCH2	341277
OXNAD1	92106
P2RY14	9934
PARVA	55742
PCDH12	51294
PCDH8	5100
PCDHA1	56147
PCDHA12	56137
PCDHA2	56146
PCDHA6	56142
PCDHB11	56125
PCDHB12	56124
PCDHB13	56123
PCDHB16	57717
PCDHB4	56131
PCDHB8	56128
PCDHB9	56127
PCDHGA1	56114
PCDHGB1	56104
PCDHGB4	8641
PCGF2	7703
PDE11A	50940
PDE6A	5145
PDE8B	8622
PDGFRB	5159
PDLIM3	27295
PDZD2	23037
PEMT	10400
PER3	8863
PEX10	5192
PFKFB2	5208
PGLYRP4	57115
PHC2	1912
PHF14	9678
PHF20	51230
PHF21A	51317
PHKG1	5260
PHLDB1	23187
PIGV	55650
PIK3R1	5295
PITPNM2	57605
PKIB	5570
PKIG	11142
PLA2G4D	283748
PLAU	5328
PLCB1	23236
PLCE1	51196
PLD1	5337
PLEKHA5	54477
POFUT2	23275
POLD3	10714
POLK	51426
POLR2C	5432
POLR3B	55703
POR	5447
POT1	25913
POU2F1	5451
PPFIBP1	8496
PPP2R2B	5521
PPP2R2C	5522
PPP5C	5536
PRC1	9055
PRDM10	56980
PRICKLE2	166336
PRKD1	5587
PRKG2	5593
PTF1A	256297
PTGFRN	5738
PTPN14	5784
PTPN18	26469
PTPRC	5788
PTPRD	5789
PTPRN2	5799
PTPRR	5801
PXT1	222659
RAB27A	5873
RAB5C	5878
RAG2	5897
RALGPS1	9649
RAPSN	5913
RARB	5915
RASAL2	9462
RASSF1	11186
RBAK	57786
RBM24	221662
RCN1	5954
RCOR1	23186
RDX	5962
RFPL2	10739
RFT1	91869
RFX4	5992
RGL1	23179
RGS12	6002
RGS7	6000
RHBDD1	84236
RHPN2	85415
RIMBP2	23504
RIMS2	9699
RIOK1	83732
RNF44	22838
ROPN1	54763
ROPN1B	152015
RP1	6101
RPL27A	6157
RPS23	6228
RTBDN	83546
RTEL1	51750
RTN4	57142
RTP1	132112
RUFY3	22902
RYR3	6263
S100A2	6273
S100A6	6277
S100A8	6279
SAMD4A	23034
SARDH	1757
SBK1	388228
SCGN	10590
SCN5A	6331
SCNN1G	6340
SCRN1	9805
SCRT2	85508
SCUBE3	222663
SDCBP2	27111
SDHA	6389
SEL1L	6400
SEMA3D	223117
SENP6	26054
SENP7	57337
SERPINC1	462
SGCD	6444
SH2D4A	63898
SH3PXD2A	9644
SHANK2	22941
SHE	126669
SKIL	6498
SLC11A1	6556
SLC19A1	6573
SLC1A5	6510
SLC22A17	51310
SLC23A2	9962
SLC25A2	83884
SLC25A21	89874
SLC25A23	79085
SLC25A29	123096
SLC26A9	115019
SLC27A2	11001
SLC35E4	339665
SLC43A3	29015
SLC44A1	23446
SLC44A3	126969
SLC5A1	6523
SLC5A8	160728
SLC6A3	6531
SLC7A11	23657
SLC7A7	9056
SLC9A2	6549
SMAD9	4093
SMN2	6607
SMOC2	64094
SNTG1	54212
SORBS1	10580
SOX5	6660
SOX6	55553
SPAG7	9552
SPTBN1	6711
ST3GAL6	10402
ST5	6764
ST8SIA2	8128
STAB1	23166
STARD4	134429
STMN1	3925
STON2	85439
STRA6	64220
STXBP5	134957
SUFU	51684
SUSD4	55061
SVIL	6840
SYCE1	93426
SYCP1	6847
SYCP2	10388
SYN2	6854
SYNE1	23345
SYNE2	23224
SYT7	9066
TACR1	6869
TANC1	85461
TBC1D1	23216
TBP	6908
TCF12	6938
TCIRG1	10312
TCL1B	9623
TEAD1	7003
TGFA	7039
TGFBR1	7046
THSD4	79875
TJP2	9414
TM4SF4	7104
TMCO3	55002
TMEM100	55273
TMEM37	140738
TMEM87B	84910
TNFRSF13B	23495
TNFRSF8	943
TNFSF13B	10673
TOM1L1	10040
TPCN1	53373
TPD52L1	7164
TPM3	7170
TRERF1	55809
TRIM10	10107
TRIM29	23650
TRIM31	11074
TRNT1	51095
TRPC6	7225
TRPM4	54795
TRPM5	29850
TRPV4	59341
TSPAN32	10077
TTC16	158248
TTLL11	158135
TUSC2	11334
TXLNA	200081
UNC5C	8633
USP10	9100
USP2	9099
USP21	27005
USP6NL	9712
UST	10090
VGLL2	245806
VPS28	51160
VSX1	30813
WDR72	256764
WDSUB1	151525
WRNIP1	56897
WWOX	51741
WWTR1	25937
XKR6	286046
YES1	7525
YIF1B	90522
ZBTB10	65986
ZBTB7A	51341
ZDHHC14	79683
ZFPM1	161882
ZIC4	84107
ZIM2	23619
ZNF300	91975
ZNF304	57343
ZNF423	23090
ZNF516	9658
ZNF648	127665
ZPBP2	124626
ZPLD1	131368
ZSWIM5	57643
