# Supplementary material for: Integrated DNA methylation and gene expression analysis in the pathogenesis of coronary artery disease
Source: Aging (Albany NY). 2019 Mar 7;11(5):1486–500. doi: 10.18632/aging.101847 (PMC6428103; doi:10.18632/aging.101847)
Supplement: Supplementary Table 2 [file aging-11-101847-s002.xlsx]

## Sheet: Functional annotation for DMaGs
SampleGroup	GeneRatio	Qvalue	Count	Description	geneID
DO	9/371	0.000238415	9	DOID:9973 substance dependence	ABCC1/CNR1/HTR2A/ITGB1/KCNH2/MITF/PER3/SCN5A/SLC6A3
DO	32/371	0.000243734	32	DOID:1192 peripheral nervous system neoplasm	ABCC1/ATM/AURKB/BDNF/BMP4/CAMTA1/CDKN1C/CXCL12/DDX20/DICER1/DKK3/EGFR/ELAVL3/EPAS1/FXN/FYN/GDNF/GNAS/HLA-G/IGFBP5/IL6/INA/ITGB1/KCNH2/KIF1B/MAPT/NAV2/PIK3R1/RASSF1/SLC6A3/TGFA/ZNF423
DO	20/371	0.000248014	20	DOID:6000 congestive heart failure	ADAMTS13/ADCY6/ADRA2C/CACNA1C/CKMT1B/FSTL1/GHRL/IGFBP1/IL6/IL7/ITPR2/JPH2/KCNH2/LAMA4/LEPR/MAP4/OPA1/RTN4/SCN5A/TRPC6
DO	30/371	0.000250008	30	DOID:0080000 muscular disease	ADRA2C/ATXN7/BDNF/CAST/CD274/COL9A1/CRYM/DDX20/ESR1/FRG1/FXN/GDNF/HLA-G/IGFBP1/IL6/ITPR2/JPH2/MAPT/PDLIM3/RAB27A/S100A8/SCN5A/SDHA/SGCD/SMN2/STRA6/SYNE1/SYNE2/TPM3/TRPV4
DO	31/371	0.000265402	31	DOID:10652 Alzheimer's disease	ABCG1/ANK3/BDNF/BMP6/CAMK2A/CAST/CHRFAM7A/CORT/CYP7B1/DKK3/ERG/ESR1/FYN/GAPDH/GHRL/GNAS/HK1/HTR2A/IDE/IL6/ITGB1/KALRN/LRP1/MAPT/PDE8B/PLAU/RTN4/SEL1L/SLC6A3/STMN1/TBP
DO	29/371	0.000271229	29	DOID:423 myopathy	ADRA2C/ATXN7/BDNF/CAST/CD274/COL9A1/CRYM/DDX20/ESR1/FRG1/FXN/GDNF/HLA-G/IGFBP1/IL6/ITPR2/JPH2/MAPT/PDLIM3/RAB27A/S100A8/SCN5A/SDHA/SGCD/SMN2/SYNE1/SYNE2/TPM3/TRPV4
DO	17/371	0.000273431	17	DOID:9352 type 2 diabetes mellitus	ACACA/BDNF/BMP6/CXCL12/FXN/IDE/IGFBP1/IL12B/IL6/ITGB1/LEPR/LIPC/PTPRC/PTPRN2/RDX/S100A8/SLC11A1
DO	20/371	0.000275465	20	DOID:5844 myocardial infarction	ADAMTS13/BDNF/CASR/CDKN1C/CPB2/CXCL12/ESR1/F12/GHRL/IGFBP1/IL12B/IL6/ITGB1/KCNMA1/LAMA3/LIPC/LRRFIP1/MAPT/PTPRC/SERPINC1
DO	12/371	0.000276629	12	DOID:0050700 cardiomyopathy	ADRA2C/CD274/ESR1/FXN/HLA-G/IGFBP1/IL6/ITPR2/JPH2/SCN5A/SDHA/SGCD
DO	15/371	0.000281466	15	DOID:854 collagen disease	BLK/DCN/ENPP2/ESR1/HTR2A/IGFBP1/IL6/PDGFRB/PLAU/PTPRC/RCN1/SKIL/SLC11A1/TGFBR1/TNFSF13B
DO	22/371	0.000300574	22	DOID:3393 coronary artery disease	ADAMTS13/BDNF/CASR/CDKN1C/CPB2/CXCL12/ESR1/F12/GHRL/IGFBP1/IL12B/IL18BP/IL6/ITGB1/KCNMA1/LAMA3/LIPC/LRRFIP1/MAPT/MGP/PTPRC/SERPINC1
DO	18/371	0.000303742	18	DOID:9970 obesity	ACP5/BDNF/BMPR1A/CALCB/CNR1/ENPP2/ESR1/GNAS/HK1/HTR2A/IL6/LEPR/LIPC/MKKS/NMU/PEMT/S100A8/SLC6A3
KEGG	11/304	0.00218634	11	hsa04750 Inflammatory mediator regulation of TRP channels	ADCY6/ADCY8/CAMK2A/GNAS/HTR2A/IL1R1/ITPR2/PIK3R1/PLA2G4D/PLCB1/TRPV4
KEGG	16/304	0.00312432	16	hsa04020 Calcium signaling pathway	ADCY8/ATP2A1/CACNA1C/CAMK2A/EGFR/ERBB4/GNAS/HTR2A/ITPR2/NTSR1/PDGFRB/PHKG1/PLCB1/PLCE1/RYR3/TACR1
KEGG	22/304	0.00412105	22	hsa04060 Cytokine-cytokine receptor interaction	BMP4/BMP6/BMPR1A/BMPR1B/CCL1/CCL26/CCL8/CXCL12/GDF10/IL12B/IL16/IL1R1/IL20/IL6/IL7/LEPR/LIFR/OSMR/TGFBR1/TNFRSF13B/TNFRSF8/TNFSF13B
KEGG	10/304	0.00546529	10	hsa04713 Circadian entrainment	ADCY6/ADCY8/CACNA1C/CAMK2A/GNAS/GNGT1/PER3/PLCB1/PRKG2/RYR3
KEGG	9/304	0.00740548	9	hsa04911 Insulin secretion	ADCY6/ADCY8/CACNA1C/CAMK2A/GNAS/KCNMA1/PLCB1/RIMS2/TRPM4
KEGG	11/304	0.0113097	11	hsa04611 Platelet activation	ADCY6/ADCY8/FYN/GNAS/GP5/ITGB1/ITPR2/PIK3R1/PLA2G4D/PLCB1/PRKG2
KEGG	3/304	0.0140915	3	hsa00061 Fatty acid biosynthesis	ACACA/ACSL5/ACSL6
KEGG	12/304	0.0141665	12	hsa04514 Cell adhesion molecules (CAMs)	CD274/CDH5/CLDN6/CNTNAP2/HLA-E/HLA-G/ITGB1/NCAM2/NFASC/NRCAM/NRXN1/PTPRC
KEGG	20/304	0.0170475	20	hsa04010 MAPK signaling pathway	BDNF/CACNA1C/CACNB2/DUSP4/DUSP5/EGFR/ERBB4/FGFR2/HSPA2/IL1R1/MAP3K14/MAP3K3/MAPT/PDGFRB/PLA2G4D/PPP5C/PTPRR/STMN1/TGFA/TGFBR1
KEGG	23/304	0.0174333	23	hsa04151 PI3K-Akt signaling pathway	BDNF/COL9A1/EGFR/ERBB4/FGFR2/GNGT1/HSP90AB1/IL6/IL7/ITGB1/LAMA3/LAMA4/LAMB1/LAMB3/MAGI2/MYB/OSMR/PDGFRB/PIK3R1/PPP2R2B/PPP2R2C/TCL1B/TGFA
Biological Process	28/643	3.20918e-12	28	GO:0007156 homophilic cell adhesion via plasma membrane adhesion molecules	CDH13/CDH23/CDH24/CDH26/CDH5/CDH8/CELSR3/DCHS2/FAT3/FAT4/IGSF9/ITGB1/PCDH12/PCDH8/PCDHA1/PCDHA12/PCDHA2/PCDHA6/PCDHB11/PCDHB12/PCDHB13/PCDHB16/PCDHB4/PCDHB8/PCDHB9/PCDHGA1/PCDHGB1/PCDHGB4
Biological Process	32/643	2.76358e-10	32	GO:0098742 cell-cell adhesion via plasma-membrane adhesion molecules	ATP2C1/CDH13/CDH23/CDH24/CDH26/CDH5/CDH8/CELSR3/CLDN6/DCHS2/FAT3/FAT4/IGSF9/ITGB1/NRXN1/PCDH12/PCDH8/PCDHA1/PCDHA12/PCDHA2/PCDHA6/PCDHB11/PCDHB12/PCDHB13/PCDHB16/PCDHB4/PCDHB8/PCDHB9/PCDHGA1/PCDHGB1/PCDHGB4/PTPRD
Biological Process	14/643	7.06554e-10	14	GO:0016339 calcium-dependent cell-cell adhesion via plasma membrane cell adhesion molecules	ATP2C1/CDH13/CDH23/CDH24/CDH26/CDH5/CDH8/PCDH12/PCDHB11/PCDHB13/PCDHB16/PCDHB4/PCDHB9/PCDHGB4
Biological Process	32/643	7.66721e-08	32	GO:0050808 synapse organization	ANK3/BAIAP2/BDNF/CACNB2/CYFIP1/ETV5/FYN/GDNF/GHRL/IGSF9/KALRN/LMX1A/LRP4/MAGI2/MAPT/MYO5A/NFASC/NPAS4/NRCAM/NRXN1/OPA1/PCDHB11/PCDHB12/PCDHB13/PCDHB16/PCDHB4/PCDHB8/PCDHB9/PTPRD/RAPSN/SHANK2/TANC1
Biological Process	43/643	1.45038e-07	43	GO:0061564 axon development	ANK3/APBB2/BAIAP2/BDNF/BMPR1B/CELSR3/CNR1/CXCL12/CYFIP1/EVL/FGFR2/FYN/GDNF/GFRA3/GP5/INPP5F/ITGB1/LGI1/LHX1/LMX1A/LRP4/MACF1/MAPT/MATN2/NCAM2/NFASC/NR4A2/NR4A3/NRCAM/NRP1/NRXN1/PIK3R1/RTN4/RUFY3/S100A6/SEMA3D/SKIL/SPTBN1/STMN1/TNFRSF8/UNC5C/UST/ZSWIM5
Biological Process	40/643	2.78074e-07	40	GO:0007409 axonogenesis	ANK3/APBB2/BAIAP2/BDNF/BMPR1B/CELSR3/CXCL12/CYFIP1/EVL/FGFR2/FYN/GDNF/GFRA3/GP5/ITGB1/LGI1/LHX1/LMX1A/LRP4/MACF1/MAPT/MATN2/NFASC/NR4A2/NR4A3/NRCAM/NRP1/NRXN1/PIK3R1/RTN4/RUFY3/S100A6/SEMA3D/SKIL/SPTBN1/STMN1/TNFRSF8/UNC5C/UST/ZSWIM5
Biological Process	38/643	7.27959e-07	38	GO:0042391 regulation of membrane potential	ANK2/ANK3/BAIAP2/CACNA1C/CACNB2/CASQ2/CHRFAM7A/CHRNB4/CNR1/DCN/FGF12/GABRB1/GABRD/GABRR3/GHRL/GJA5/GLRA1/GPR88/GRIK1/KCNH2/KCNH7/KCNK10/KCNK9/KCNMA1/MAPT/NETO1/NPAS4/NRCAM/NRXN1/NTSR1/RIMS2/SCN5A/SHANK2/SLC26A9/TACR1/TPCN1/TRPM4/TUSC2
Biological Process	32/643	1.16787e-06	32	GO:0045666 positive regulation of neuron differentiation	ADRA2C/AP2A1/ARSB/ATF1/BAIAP2/BDNF/BMP4/BMP6/CNR1/CXCL12/CYFIP1/DLX2/DNMT3B/ETV5/FYN/KALRN/MACF1/MAGI2/MAPT/NRCAM/NRP1/OPA1/PRKD1/PTPRD/RARB/RIMS2/RTN4/RUFY3/SHANK2/SKIL/TCF12/TRPC6
Cellular Component	38/655	5.58547e-07	38	GO:0098794 postsynapse	ANK1/ANK2/ANK3/ANKS1B/BAIAP2/BCL11A/CACNA1C/CAMK2A/CHRNB4/COL13A1/CPEB1/CYFIP1/FYN/GABBR1/GABRB1/GABRD/GABRR3/GHRL/GLRA1/GRIK1/IQSEC3/ITGB1/KALRN/KCNMA1/LRP4/MAGI2/MAP4/MAPT/NETO1/NPAS4/NTSR1/PCDH8/RAPSN/RTN4/SHANK2/SPTBN1/SYNE1/TANC1
Cellular Component	32/655	9.61309e-07	32	GO:0033267 axon part	ADRA2C/ANK1/ANK3/APBB2/CASR/CDH8/CNR1/CNTNAP2/CPLX1/CYFIP1/DICER1/DST/KCNQ2/KIF1B/MAPT/MYO5A/NFASC/NMU/NRCAM/NRP1/NTSR1/OPA1/PCDHGB1/PTPRN2/RTN4/RUFY3/SCGN/SHANK2/SPTBN1/SYT7/TANC1/TRPV4
Cellular Component	32/655	2.10054e-06	32	GO:0045177 apical part of cell	ANK2/AP2A1/ATP8B1/CASR/EGFR/ENPEP/EPB41L4B/F2RL2/FAT4/FZD6/GNAS/HSP90AB1/KCNMA1/LCT/LGMN/MYO5B/MYO6/OSMR/OTOA/PDGFRB/PLD1/PRKG2/RAB27A/RDX/SCNN1G/SHANK2/SLC19A1/SLC23A2/SLC26A9/SLC5A8/TCIRG1/TRPV4
Cellular Component	29/655	2.57974e-06	29	GO:0097060 synaptic membrane	ANK1/ANK2/ANK3/ANKS1B/BAIAP2/CAMK2A/CHRNB4/CNR1/COL13A1/CPEB1/GABBR1/GABRB1/GABRD/GABRR3/GLRA1/GRIK1/IQSEC3/ITGB1/KCNMA1/LRP4/NETO1/NRXN1/PCDH8/RAPSN/RIMS2/SHANK2/SYNE1/SYT7/TANC1
Cellular Component	32/655	3.32379e-06	32	GO:0043235 receptor complex	BMPR1A/BMPR1B/CHRFAM7A/CHRNB4/EGFR/EPHA6/ERBB4/FGFR2/GABBR1/GABRB1/GABRD/GABRR3/GFRA3/GRIK1/HSP90AB1/IL6/ITGB1/ITPR2/LEPR/LIFR/LRP1/LRP1B/LRP4/NRP1/OSMR/PDGFRB/PTPRN2/SHANK2/SORBS1/STXBP5/TGFBR1/TSPAN32
Cellular Component	27/655	7.69273e-06	27	GO:0016324 apical plasma membrane	ANK2/AP2A1/ATP8B1/CASR/EGFR/ENPEP/F2RL2/FZD6/GNAS/HSP90AB1/KCNMA1/LCT/OSMR/OTOA/PDGFRB/PLD1/PRKG2/RAB27A/RDX/SCNN1G/SHANK2/SLC19A1/SLC23A2/SLC26A9/SLC5A8/TCIRG1/TRPV4
Cellular Component	20/655	2.06565e-05	20	GO:0030017 sarcomere	ANK1/ANK2/ANK3/ANKRD2/CACNA1C/CASQ2/DST/FRG1/JPH2/KY/MYL4/PARVA/PDLIM3/RYR3/SCN5A/SMN2/SPTBN1/SYNE1/SYNE2/TPM3
Cellular Component	21/655	2.16555e-05	21	GO:0044449 contractile fiber part	ANK1/ANK2/ANK3/ANKRD2/CACNA1C/CASQ2/DST/FRG1/JPH2/KY/MYL4/PARVA/PDLIM3/RYR3/SCN5A/SMN2/SPTBN1/SVIL/SYNE1/SYNE2/TPM3
Molecular Function	34/636	6.70751e-06	34	GO:0003779 actin binding	ABLIM1/ANLN/ANTXR1/CACNB2/CTNNAL1/CYFIP1/DST/EGFR/EVL/FGD4/FHOD1/FMN2/FMNL2/FRG1/ITGB1/KCNMA1/KLHL20/MACF1/MAPT/MYL4/MYO5A/MYO5B/MYO6/PARVA/RDX/SNTG1/SORBS1/SPTBN1/SVIL/SYNE1/SYNE2/TPM3/TRPC6/TRPV4
Molecular Function	31/636	0.000121796	31	GO:0000982 transcription factor activity, RNA polymerase II proximal promoter sequence-specific DNA binding	BCL11A/CAMTA1/EBF3/EHF/EPAS1/ERG/ESR1/ETS2/HESX1/IRF7/KLF5/LRRFIP1/MESP2/MITF/MYB/MYT1L/NFYC/NPAS4/NR2E3/NR4A2/NR4A3/PTF1A/RCOR1/RFX4/SCRT2/SKIL/SOX6/TCF12/TEAD1/ZBTB7A/ZFPM1
Molecular Function	26/636	0.000136975	26	GO:0045296 cadherin binding	ANK3/ANLN/ARHGAP18/BAIAP2/CAST/CDH13/CDH24/CDH26/CDH5/CDH8/CTNNAL1/EGFR/FMNL2/HSP90AB1/ITGB1/KLC2/LRRFIP1/MACF1/MYO6/PARVA/PPFIBP1/RDX/RTN4/SPTBN1/TJP2/TRIM29
Molecular Function	17/636	0.000202105	17	GO:0051015 actin filament binding	ABLIM1/ANTXR1/CACNB2/CTNNAL1/CYFIP1/EGFR/FRG1/MACF1/MYL4/MYO5A/MYO5B/MYO6/SVIL/SYNE1/SYNE2/TPM3/TRPV4
Molecular Function	26/636	0.000232711	26	GO:0022839 ion gated channel activity	CACNA1C/CACNB2/CHRFAM7A/CHRNB4/GABRB1/GABRD/GABRR3/GLRA1/GRIK1/ITPR2/JPH2/KCNH2/KCNH7/KCNIP4/KCNK10/KCNK9/KCNMA1/KCNQ2/RYR3/SCN5A/SCNN1G/TMEM37/TPCN1/TRPM4/TRPM5/TRPV4
Molecular Function	26/636	0.000267479	26	GO:0022836 gated channel activity	CACNA1C/CACNB2/CHRFAM7A/CHRNB4/GABRB1/GABRD/GABRR3/GLRA1/GRIK1/ITPR2/JPH2/KCNH2/KCNH7/KCNIP4/KCNK10/KCNK9/KCNMA1/KCNQ2/RYR3/SCN5A/SCNN1G/TMEM37/TPCN1/TRPM4/TRPM5/TRPV4
Molecular Function	14/636	0.000337186	14	GO:0019838 growth factor binding	EGFR/FGFR2/HTRA4/IGFBP1/IGFBP5/IL1R1/LIFR/LTBP3/NRP1/OSMR/PDGFRB/SCN5A/TGFBR1/TNFRSF8
