# Supplementary material for: Integrated DNA methylation and gene expression analysis in the pathogenesis of coronary artery disease
Source: Aging (Albany NY). 2019 Mar 7;11(5):1486–500. doi: 10.18632/aging.101847 (PMC6428103; doi:10.18632/aging.101847)
Supplement: Supplementary Table 3 [file aging-11-101847-s003.xlsx]

## Sheet: The primers designed for target
	F	R
BTRC	GATACGGTGGGTAGAGGGGA	ATACAAAGCACCTGGCCTCC
CDH5	GAGCATCCAGGCAGTGGTAG	ATTGCAGATTGGAGGCAGGG
CXCL12	TCTTGACCGCAACATTGCTC	ATTATGACGCATTGCCCAGGA
EGFR	CAGTATTGATCGGGAGAGCCG	CGAAACGTCCCGTTCCTCC
ITGB1	AAAGCGAGGATGAGGGCTTG	AAGCCAGAATTGGGGTACATTA
PDGFRB	TGGGAGAGGAGGTATCAGACA	TGGCCATAAGATGGACTGGC
PLCB1	ATGCCTTTCTTACATTTTTCAGTCG	AAAGCTGACAGGCAACTCCA
PTPRC	GCAGCTAGCAAGTGGTTTGT	AGGCTTCTCACTTCCAGTTACC
IL-6	CAGGCACCCCAGTTAATCTCA	CATTTGCCGAAGAGCCCTCA
BDNF	GGAACCACGATGTGACTCCG	CTCACCTGGTGGAACTCGGG
PIK3R1	CCGAGTGTGAGTCTGCTCTTT	CCTCCACTGGCCTTTCCAAC
