# Supplementary material for: Integrated DNA methylation and gene expression analysis in the pathogenesis of coronary artery disease
Source: Aging (Albany NY). 2019 Mar 7;11(5):1486–500. doi: 10.18632/aging.101847 (PMC6428103; doi:10.18632/aging.101847)
Supplement: Supplementary Table 4 [file aging-11-101847-s004.xlsx]

## Sheet: Primer for RT-PCR
	F	R
BTRC	GCGTGGGGACTGTTACTGAA	CAGTCGTGAATGCACCTCCT
CDH5	GGGGAGGCTTCACAGGAAAA	AGTGATACTGGCCTGATGCG
CXCL12	TTCTAGAGGGTTGCTTGCGG	GGCGGAGGTATTATGACGCA
EGFR	CCCCTGACTCCGTCCAGTAT	AACGAAACGTCCCGTTCCTC
ITGB1	TGCTGTTCCTTTGCTACGGT	TGTTTAAAAGCCAGAATTGGGGT
PDGFRB	AGCAGGTCAGAACGAAGGTG	AGCCCCTGTTTCCTGATGTC
PLCB1	AGGACTGACCCTCAGGGATT	ACTGCAAAAGATCTGTGAAATGGA
PTPRC	GGAAGTGAGAAGCCTGCTGT	CGCCGCTCAAGAACTATCCA
IL-6	GCTTCCCTCAGGATGCTTGT	ATTAACTGGGGTGCCTGCTC
BDNF	GTTTGTGTGGACCCCGAGTT	GCAGCCTTCATGCAACCAAA
PIK3R1	GCCCGGAAATCCAGCTTTTG	ACTTGAGCCTCATCACACCA
